# Supplementary material for: Synthesis of FeO@SiO 2 –DNA core–shell engineered nanostructures for rapid adsorption of heavy metals in aqueous solutions
Source: Royal Society of Chemistry journal article supplement (doi:10.1039/d0ra06743a), 2020-01-01
Supplement: d0ra06743a1.pdf [file d0ra06743a1.pdf]

## SUPPLEMENTARY MATERIAL

### **Synthesis of FeO@SiO<sub>2</sub>-DNA core-shell engineered nanostructures for rapid adsorption of heavy metals in aqueous solutions**

David Patiño-Ruiz<sup>a</sup>, Lars Rehm<sup>b</sup>, Mehrab Mehrvar<sup>c</sup>, Edgar Quiñones-Bolaños<sup>a,d</sup>, and  
Adriana Herrera<sup>a,e\*</sup>

<sup>a</sup>Engineering Doctorate Program, Nanomaterials and Computer-Aided Process Engineering Research Group, Universidad de Cartagena, Cartagena, 130010, Colombia

<sup>b</sup>Department of Chemical and Biochemical Engineering, University of Western Ontario, London, N6A 3K7, Canada

<sup>c</sup>Department of Chemical Engineering, Ryerson University, Toronto, M5B 2K3, Canada

<sup>d</sup>Civil Engineering Program, Environmental Modelling Research Group, Universidad de Cartagena, Cartagena, 130010, Colombia

<sup>e</sup>Chemical Engineering Program, Nanomaterials and Computer-Aided Process Engineering Research Group, Universidad de Cartagena, Cartagena, 130010, Colombia

\*Email: [aherrerab2@unicartagena.edu.co](mailto:aherrerab2@unicartagena.edu.co)

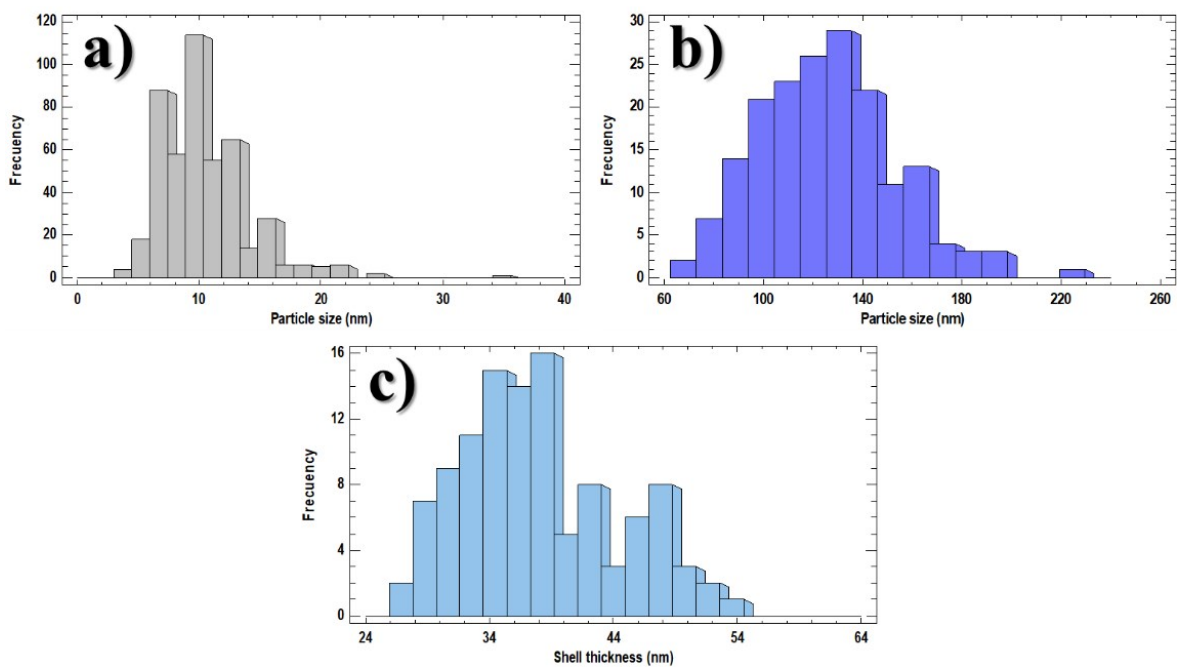

**Figure S1.** Particle size distribution of **(a)** FeO/ca-NPs ( $10.2 \pm 3.7$  nm), **(b)** FeO@SiO<sub>2</sub> ( $125 \pm 27$  nm), and **(c)** SiO<sub>2</sub> shell thickness ( $38 \pm 6$  nm).

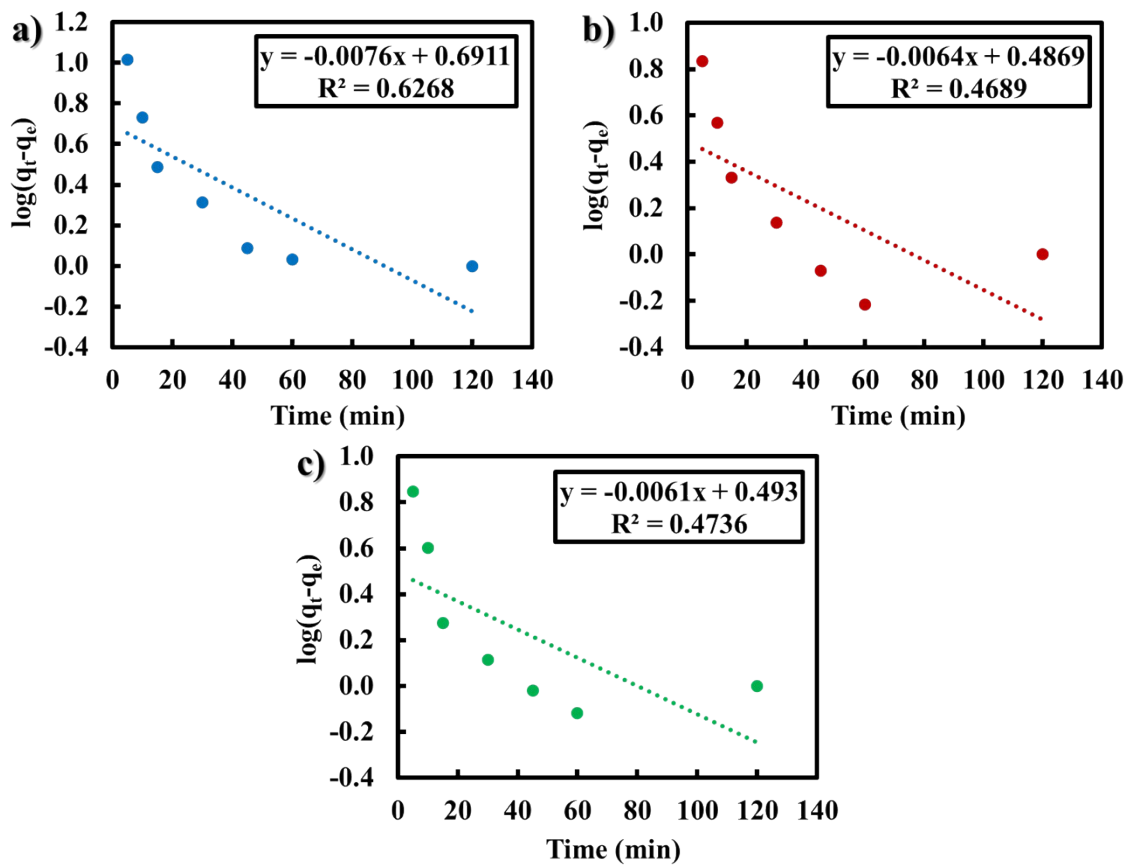

**Figure S2.** Experimental data fitting based on the Pseudo-first order model for the adsorption of (a) Pb(II), (b) As(III), and (c) Hg(II).

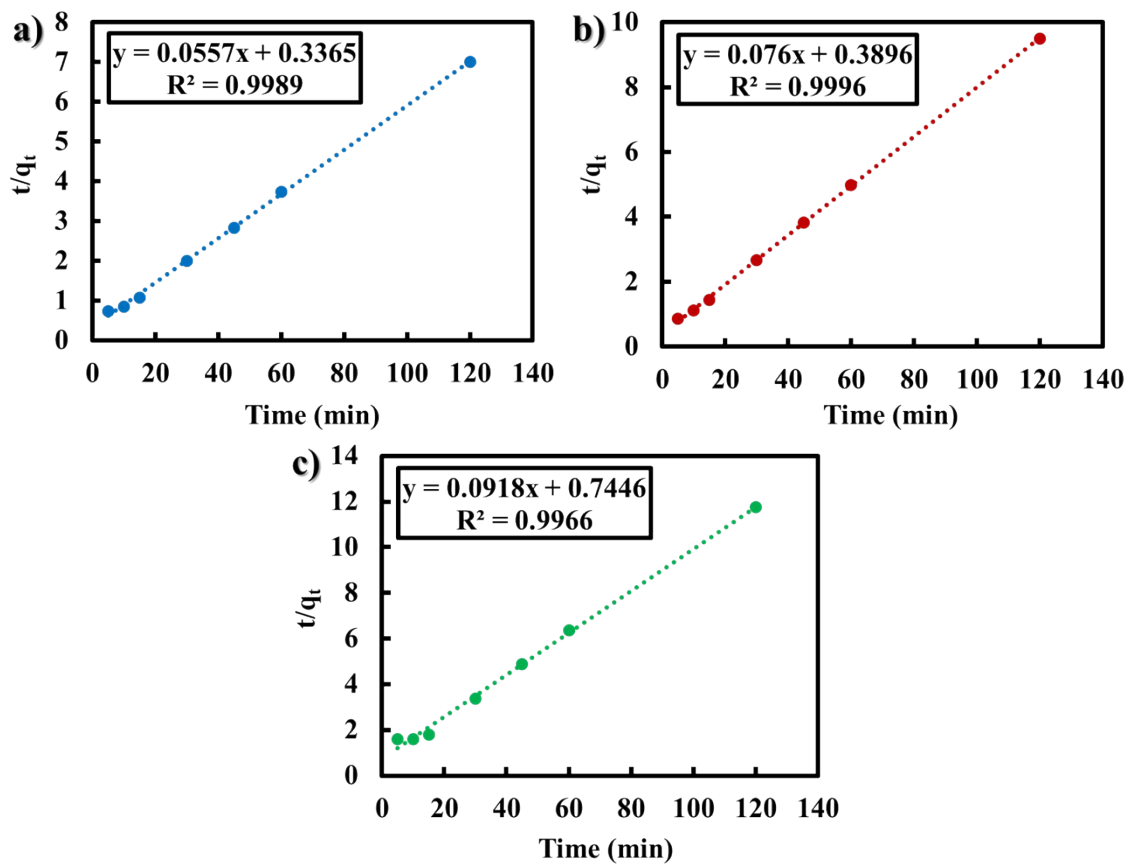

**Figure S3.** Experimental data fitting based on the Pseudo-second order model for the adsorption of (a) Pb(II), (b) As(III), and (c) Hg(II).

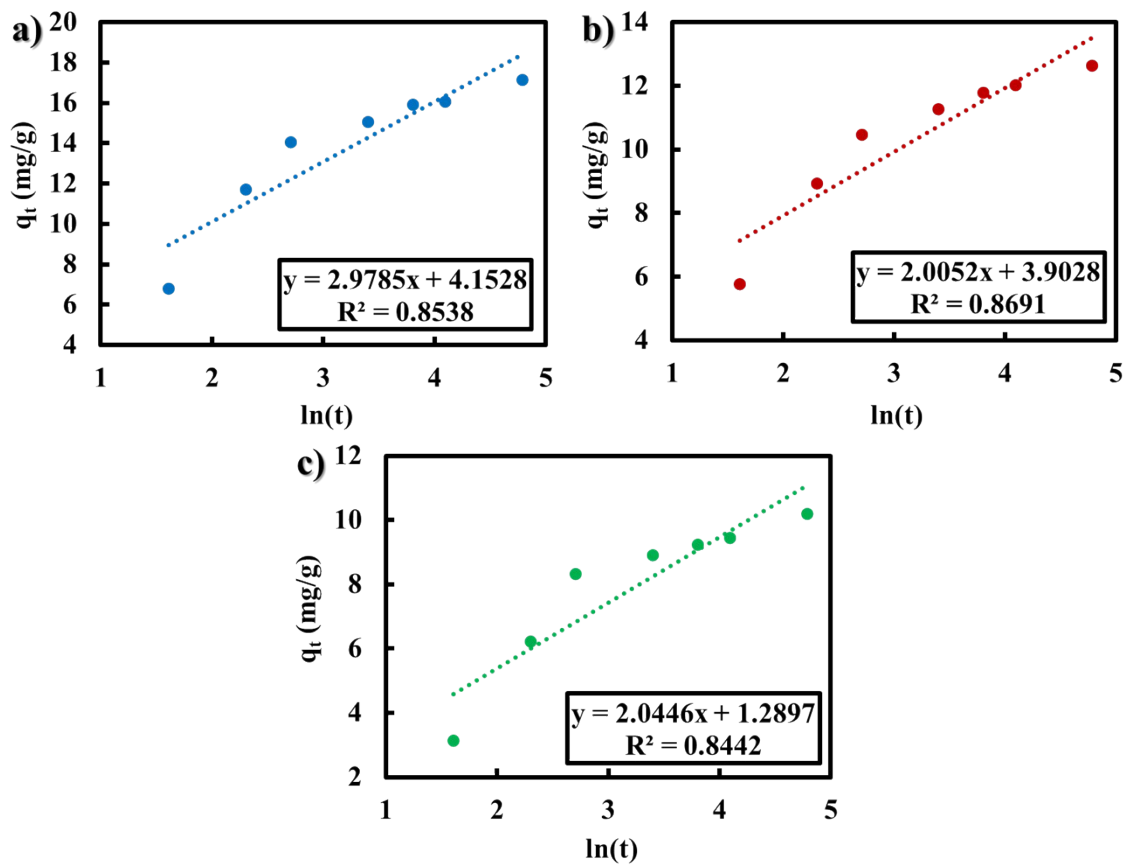

**Figure S4.** Experimental data fitting based on the Elovich model for the adsorption of (a) Pb(II), (b) As(III), and (c) Hg(II).
